# Supplementary material
Source: PubMed Central journal article supplement (PMC5344747)

## Supplementary Online Content

Gavin PG, Song N, Kim SR, et al. Association of polymorphisms in *FCGR2A* and *FCGR3A* with degree of trastuzumab benefit in the adjuvant treatment of ERBB2/HER2–positive breast cancer: analysis of the NSABP B-31 Trial. *JAMA Oncol*. Published online November 3, 2016. doi:10.1001/jamaoncol.2016.4884

**eMethods.** Single Nucleotide Polymorphisms (SNP) Analysis of *FCGR2A* and *FCGR3A* Polymorphisms Using the Sequenom Platform

**eTable 1.** Clinical Characteristics According to Treatment Arm

**eTable 2.** Association of Clinical Characteristics with *FCGR3A*-158

**eTable 3.** Association of Clinical Characteristics with *FCGR2A*-131

**eFigure 1.** REMARK Study Flow Diagram

**eFigure 2.** Proportional Hazard Models Examining the Prognostic Effect of Genotype According to Treatment Arm

This supplementary material has been provided by the authors to give readers additional information about their work.

# Polymorphisms in *FCGR3A* Predict Trastuzumab Efficacy in the Adjuvant Treatment of HER2 Positive Breast Cancer

Patrick G. Gavin, BS, Nan Song, PhD, Seong Rim Kim, MD, et al.

| Table of Contents                                                                                                                           | Page |
|---------------------------------------------------------------------------------------------------------------------------------------------|------|
| eMethods. Single Nucleotide Polymorphisms (SNP) Analysis of <i>FCGR2A</i> and <i>FCGR3A</i> Polymorphisms Using the Sequenom Platform ..... | 2    |
| eTable 1. Clinical Characteristics According to Treatment Arm .....                                                                         | 3    |
| eTable 2. Association of Clinical Characteristics with <i>FCGR3A</i> -158 .....                                                             | 4    |
| eTable 3. Association of Clinical Characteristics with <i>FCGR2A</i> -131 .....                                                             | 5    |
| eFigure 1. REMARK Study Flow Diagram .....                                                                                                  | 6    |
| eFigure 2. Proportional Hazard Models Examining the Prognostic Effect of Genotype According to Treatment Arm .....                          | 7    |

## **eMethods**

### **SNP Analysis of *FCGR2A* and *FCGR3A* Polymorphisms Using the Sequenom Platform**

We have developed an assay for the relevant single nucleotide polymorphism (SNP) in the *FCGR3A* gene (rs396991). This G/T SNP results in an amino acid change at position 158. The G allele codes for a valine and the T for a phenylalanine. Because there is extensive homology between *FCGR3A* and *FCGR3B*, it was necessary to do a nested PCR amplification. In the first round of amplification the forward and reverse primers were GCTGCAGGGCCAGAACCCAG and CACTCCGTGGCCACCGTCAC, respectively. Specificity for the *FCGR3A* gene is due to the reverse primer, which has 3 bases unique to the *FCGR3A* gene. These PCR products were used in a second round of amplification using the following PCR primers: ACGTTGGATGTTACAGTCTCTGAAGACAC, ACGTTGGATGTCCAAAAGCCACACTCAAAG and extension primer GACACATTTTTACTCCCAA.

All Sequenom PCR primers contain the same 10 bases on the 5-prime ends to enhance the specificity of the PCR reaction. The polymorphism in the *FCGR2A* gene is a C/T polymorphism at amino acid position 131 and is also known as SNP rs1801274. The (C) allele encodes arginine (R) and the (T) allele encodes histidine (H). The (H) isoform has a higher-binding affinity to IgGs, whereas the (R) isoform is considered to be low-binding. Genomic DNAs were amplified with ACGTTGGATGCTGTGACTGTGGTTTGCTTG and ACGTTGGATGCTTCCAGAATGGAAAATCCC and extended with AGAAGGTGGGATCCAAA. All reactions were performed according to the manufacturer's instructions regarding cycling conditions and concentrations.

**eTable 1. Clinical Characteristics According to Treatment Arm**

| Variable             | Category   | ACT         | ACTH        | P    |
|----------------------|------------|-------------|-------------|------|
| Total                |            | 616 (49.2%) | 635 (50.8%) |      |
| Age                  |            |             |             |      |
|                      | <60        | 519 (84.3%) | 534 (84.1%) | 0.99 |
|                      | ≥60        | 97 (15.7%)  | 101 (15.9%) |      |
| Tumor size           |            |             |             |      |
|                      | ≤2 cm      | 238 (38.6%) | 246 (38.7%) | 0.13 |
|                      | 2.1 – 5 cm | 332 (53.9%) | 325 (51.2%) |      |
|                      | >5 cm      | 42 (6.8%)   | 63 (9.9%)   |      |
|                      | Unknown    | 4 (0.6%)    | 1 (0.2%)    |      |
| Positive lymph nodes |            |             |             |      |
|                      | 1 - 3      | 362 (58.8%) | 371 (58.4%) | 0.76 |
|                      | 4 - 9      | 179 (29.1%) | 178 (28.0%) |      |
|                      | ≥10        | 75 (12.2%)  | 86 (13.5%)  |      |
| Estrogen Receptor    |            |             |             |      |
|                      | Negative   | 301 (48.9%) | 310 (48.8%) | 0.99 |
|                      | Positive   | 313 (50.8%) | 324 (51.0%) |      |
|                      | Unknown    | 2 (0.3%)    | 1 (0.2%)    |      |
| Race                 |            |             |             |      |
|                      | White      | 496 (80.5%) | 528 (83.1%) | 0.2  |
|                      | Black      | 57 (9.3%)   | 47 (7.4%)   |      |
|                      | Hispanic   | 35 (5.7%)   | 24 (3.8%)   |      |
|                      | Other      | 28 (4.5%)   | 36 (5.7%)   |      |
|                      | Unknown    | 0 (0%)      | 0 (0%)      |      |

ACT = doxorubicin and cyclophosphamide followed by paclitaxel  
 ACTH = ACT plus one year of weekly trastuzumab

**eTable 2. Association of Clinical Characteristics with FCGR3A-158**

|                       | Total       | 158 V/V     | 158 F/V     | 158 F/F     | P      |
|-----------------------|-------------|-------------|-------------|-------------|--------|
| Age                   |             |             |             |             | 0.0009 |
| < 60                  | 975 (83.8%) | 110 (79.1%) | 428 (88.4%) | 437 (80.8%) |        |
| ≥ 60                  | 189 (16.2%) | 29 (20.9%)  | 56 (11.6%)  | 104 (19.2%) |        |
| Tumor size            |             |             |             |             | 0.52   |
| ≤2 cm                 | 457 (39.3%) | 50 (36.0%)  | 193 (39.9%) | 214 (39.6%) |        |
| 2.1 – 5 cm            | 603 (51.8%) | 72 (51.8%)  | 249 (51.4%) | 282 (52.1%) |        |
| >5 cm                 | 99 (8.5%)   | 17 (12.2%)  | 41 (8.5%)   | 41 (7.6%)   |        |
| Missing               | 5 (0.4%)    | 0 (0.0%)    | 1 (0.2%)    | 4 (0.7%)    |        |
| Positive lymph nodes  |             |             |             |             | 0.79   |
| 1-3                   | 686 (58.9%) | 78 (56.1%)  | 283 (58.5%) | 325 (60.1%) |        |
| 4-9                   | 329 (28.3%) | 39 (28.1%)  | 139 (28.7%) | 151 (27.9%) |        |
| ≥10                   | 149 (12.8%) | 22 (15.8%)  | 62 (12.8%)  | 65 (12.0%)  |        |
| Estrogen receptor     |             |             |             |             | 0.51   |
| Negative              | 573 (49.2%) | 73 (52.5%)  | 229 (47.3%) | 271 (50.1%) |        |
| Positive              | 588 (50.5%) | 66 (47.5%)  | 253 (52.3%) | 269 (49.7%) |        |
| Missing               | 3 (0.3%)    | 0 (0.0%)    | 2 (0.4%)    | 1 (0.2%)    |        |
| Progesterone Receptor |             |             |             |             | 0.23   |
| Negative              | 731 (62.8%) | 95 (68.3%)  | 308 (63.6%) | 328 (60.6%) |        |
| Positive              | 429 (36.9%) | 44 (31.7%)  | 174 (36.0%) | 211 (39.0%) |        |
| Missing               | 4 (0.3%)    | 0 (0.0%)    | 2 (0.4%)    | 2 (0.4%)    |        |
| Race                  |             |             |             |             | 0.64   |
| Black                 | 100 (8.6%)  | 11 (7.9%)   | 39 (8.1%)   | 50 (9.2%)   |        |
| Hispanic              | 54 (4.6%)   | 4 (2.9%)    | 20 (4.1%)   | 30 (5.5%)   |        |
| Other                 | 59 (5.1%)   | 10 (7.2%)   | 25 (5.2%)   | 24 (4.4%)   |        |
| White                 | 951 (81.7%) | 114 (82.0%) | 400 (82.6%) | 437 (80.8%) |        |

**eTable 3. Association of Clinical Characteristics with FCGR2A-131**

|                       | Total         | 131 H/H     | 131 H/R     | 131 R/R     | <i>P</i> |
|-----------------------|---------------|-------------|-------------|-------------|----------|
| Age                   |               |             |             |             | 0.91     |
| < 60                  | 1,036 (84.2%) | 268 (84.8%) | 509 (84.3%) | 259 (83.5%) |          |
| ≥ 60                  | 194 (15.8%)   | 48 (15.2%)  | 95 (15.7%)  | 51 (16.5%)  |          |
| Tumor size            |               |             |             |             | 0.35     |
| ≤2 cm                 | 475 (38.6%)   | 123 (38.9%) | 229 (37.9%) | 123 (39.7%) |          |
| 2.1 – 5 cm            | 649 (52.8%)   | 159 (50.3%) | 323 (53.5%) | 167 (53.9%) |          |
| >5 cm                 | 102 (8.3%)    | 32 (10.1%)  | 52 (8.6%)   | 18 (5.8%)   |          |
| Missing               | 4 (0.3%)      | 2 (0.6%)    | 0 (0.0%)    | 2 (0.6%)    |          |
| Nodal Status          |               |             |             |             | 0.12     |
| 1-3                   | 724 (58.9%)   | 175 (55.4%) | 361 (59.8%) | 188 (60.6%) |          |
| 4-9                   | 347 (28.2%)   | 106 (33.5%) | 156 (25.8%) | 85 (27.4%)  |          |
| ≥10                   | 159 (12.9%)   | 35 (11.1%)  | 87 (14.4%)  | 37 (11.9%)  |          |
| Estrogen receptor     |               |             |             |             | 0.87     |
| Negative              | 602 (48.9%)   | 152 (48.1%) | 294 (48.7%) | 156 (50.3%) |          |
| Positive              | 626 (50.9%)   | 162 (51.3%) | 310 (51.3%) | 154 (49.7%) |          |
| Missing               | 2 (0.2%)      | 2 (0.6%)    | 0 (0.0%)    | 0 (0.0%)    |          |
| Progesterone receptor |               |             |             |             | 0.22     |
| Negative              | 770 (62.6%)   | 210 (66.5%) | 369 (61.1%) | 191 (61.6%) |          |
| Positive              | 456 (37.1%)   | 104 (32.9%) | 233 (38.6%) | 119 (38.4%) |          |
| Missing               | 4 (0.3%)      | 2 (0.6%)    | 2 (0.3%)    | 0 (0.0%)    |          |
| Race                  |               |             |             |             | 0.024    |
| Black                 | 104 (8.5%)    | 22 (7.0%)   | 44 (7.3%)   | 38 (12.3%)  |          |
| Hispanic              | 58 (4.7%)     | 16 (5.1%)   | 26 (4.3%)   | 16 (5.2%)   |          |
| Other                 | 64 (5.2%)     | 25 (7.9%)   | 29 (4.8%)   | 10 (3.2%)   |          |
| White                 | 1004 (81.6%)  | 253 (80.1%) | 505 (83.6%) | 246 (79.4%) |          |

eFigure 1 REMARK Study Flow Diagram

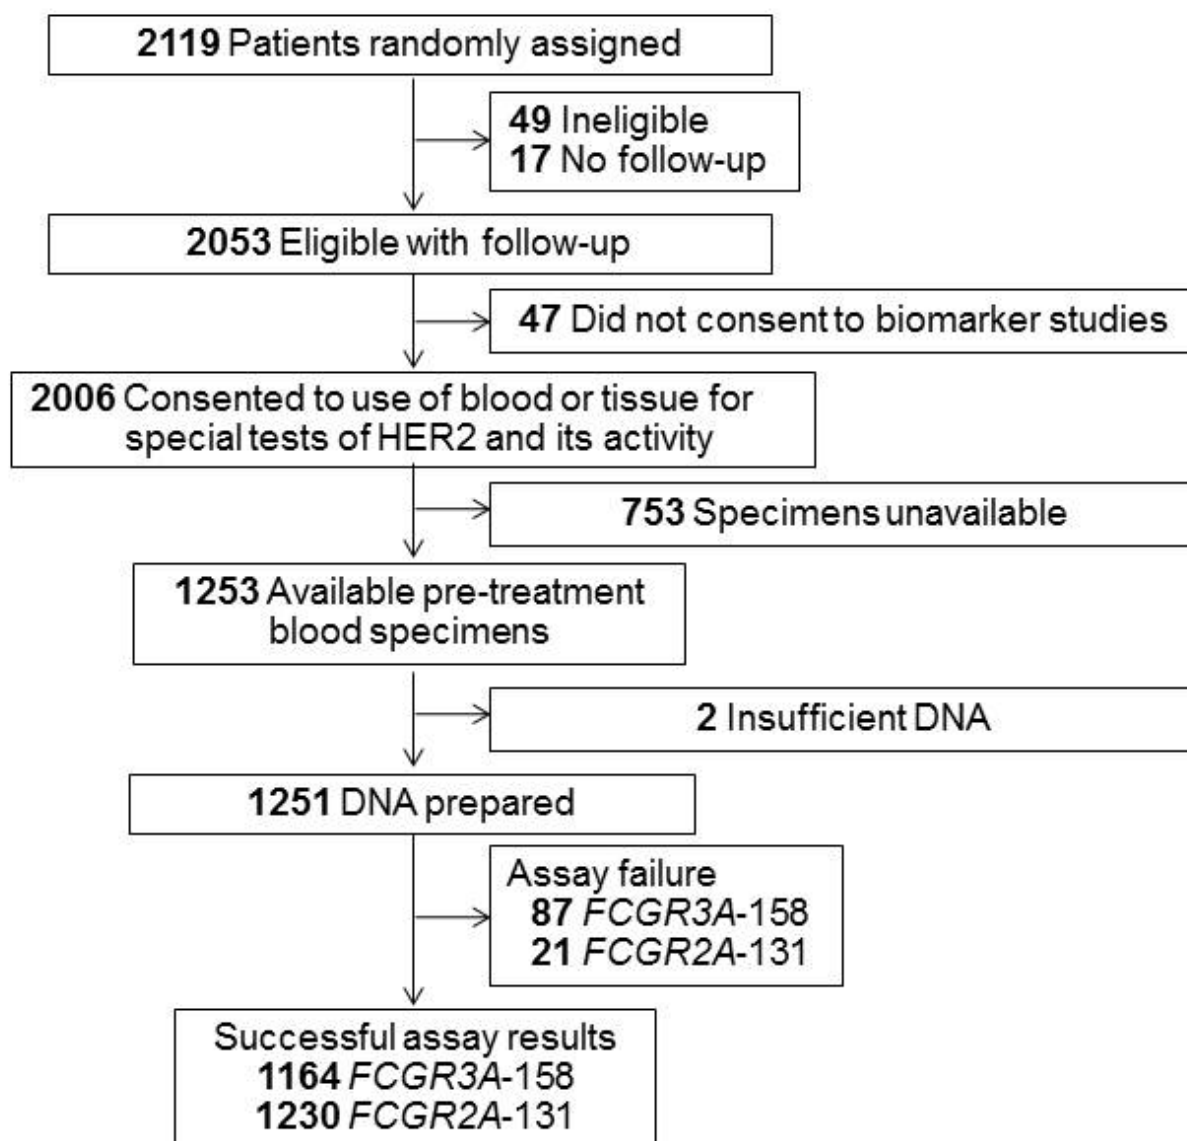

### eFigure 2. Proportional Hazard Models Examining the Prognostic Effect of Genotype According to Treatment Arm

For this analysis, the hi-affinity genotypes were combined (*FCGR2A*-HH or HR vs RR; *FCGR3A*-VV or VF vs FF) and multivariable estimates were adjusted for estrogen receptor (ER) (positive or negative) and nodal status (1-3, 4-9, or  $\leq 10$  positive lymph nodes). Due to missing ER status two patients were excluded from multivariable analysis of *FCGR2A* and three were excluded for *FCGR3A*. The box size is proportional to the precision.

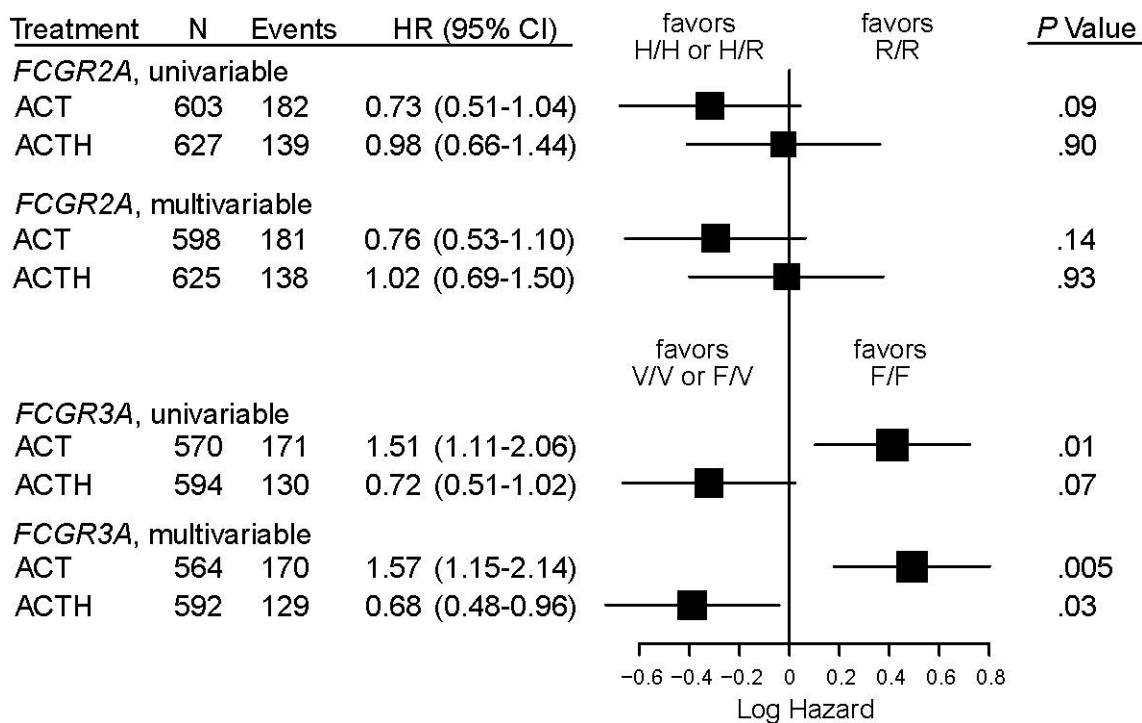

Supplement: NIHMS836198-supplement-Gavin_Polymorphisms_in_FCGR3A_Supplemental.pdf [file NIHMS836198-supplement-Gavin_Polymorphisms_in_FCGR3A_Supplemental.pdf]
